# Supplementary material for: Hydrogels Based on Poly(Ether-Ester)s as Highly Controlled 5-Fluorouracil Delivery Systems—Synthesis and Characterization
Source: PubMed Central journal article supplement (PMC7795999; doi:10.3390/ma14010098), 2020-12-28
Supplement: materials-14-00098-s001.pdf [file materials-14-00098-s001.pdf]

Supplementary Materials

# Hydrogels Based on Poly(Ether-Ester)s as Highly Controlled 5-Fluorouracil Delivery Systems—Synthesis and Characterization

Adam Kasiński <sup>1</sup>, Monika Zielińska-Pisklak <sup>1</sup>, Ewa Oledzka <sup>1</sup>, Grzegorz Nałęcz-Jawecki <sup>2</sup>, Agata Drobniewska <sup>2</sup>, Marcin Sobczak <sup>1,\*</sup>

- <sup>1</sup> Department of Biomaterials Chemistry, Chair of Analytical Chemistry and Biomaterials, Faculty of Pharmacy, Medical University of Warsaw, 1 Banacha St., 02-097 Warsaw, Poland; adam.kasinski@wum.edu.pl (A.K.); monikapisklak@o2.pl (M.Z.-P.); ewa.oledzka@wum.edu.pl (E.O.)
- <sup>2</sup> Department of Environmental Health Sciences, Faculty of Pharmacy, Medical University of Warsaw, 1 Banacha St., 02-097 Warsaw, Poland; grzegorz.nalecz-jawecki@wum.edu.pl (G.N.-J.); agata.drobniewska@wum.edu.pl (A.D.)
- \* Correspondence: marcin.sobczak@wp.pl or marcin.sobczak@wum.edu.pl

**Table S1.** HPLC gradient for 5-FU analysis.

| Time (min) | Phase A (%) (H <sub>2</sub> O + 0.1 % TFA) | Phase B (%) (ACN + 0.1 % TFA) |
|------------|--------------------------------------------|-------------------------------|
| 0          | 99                                         | 1                             |
| 7          | 96                                         | 4                             |
| 12         | 20                                         | 80                            |
| 15         | 20                                         | 80                            |
| 20         | 99                                         | 1                             |
| 25         | 99                                         | 1                             |

**Citation:** Kasiński, A.; Zielińska-Pisklak, M.; Oledzka, E.; Nałęcz-Jawecki, G.; Drobniewska, A.; Sobczak, M. Hydrogels based on poly(ether-ester)s as highly controlled 5-fluorouracil delivery systems—synthesis and characterization. *Materials* **2020**, *14*, 98. <https://doi.org/10.3390/ma14010098>

Received: 11 November 2020

Accepted: 23 December 2020

Published: 28 December 2020

**Publisher's Note:** MDPI stays neutral with regard to jurisdictional claims in published maps and institutional affiliations.

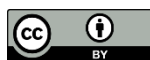

**Copyright:** © 2020 by the authors. Licensee MDPI, Basel, Switzerland. This article is an open access article distributed under the terms and conditions of the Creative Commons Attribution (CC BY) license (<http://creativecommons.org/licenses/by/4.0/>).

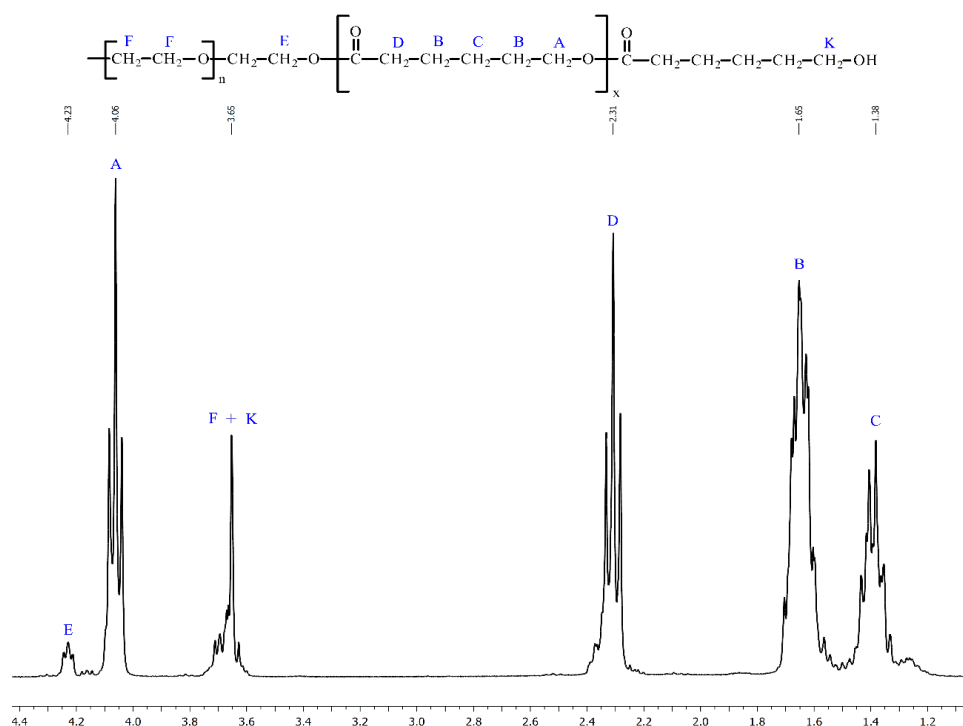

**Figure S1.** The <sup>1</sup>H NMR spectrum of CL-PEG (in CDCl<sub>3</sub>).

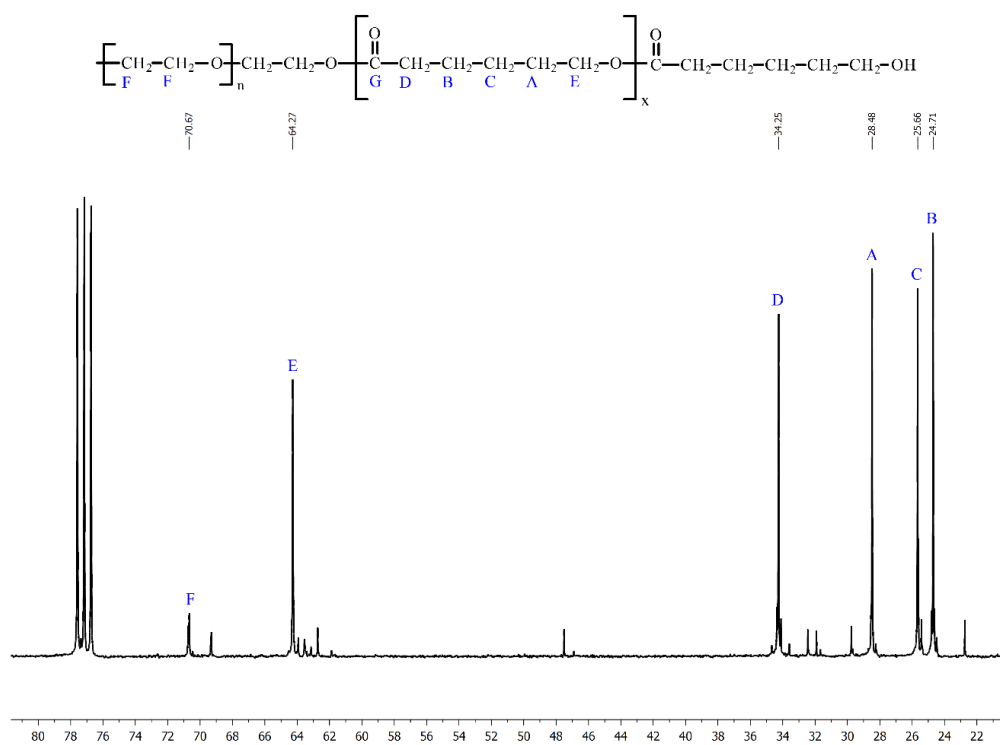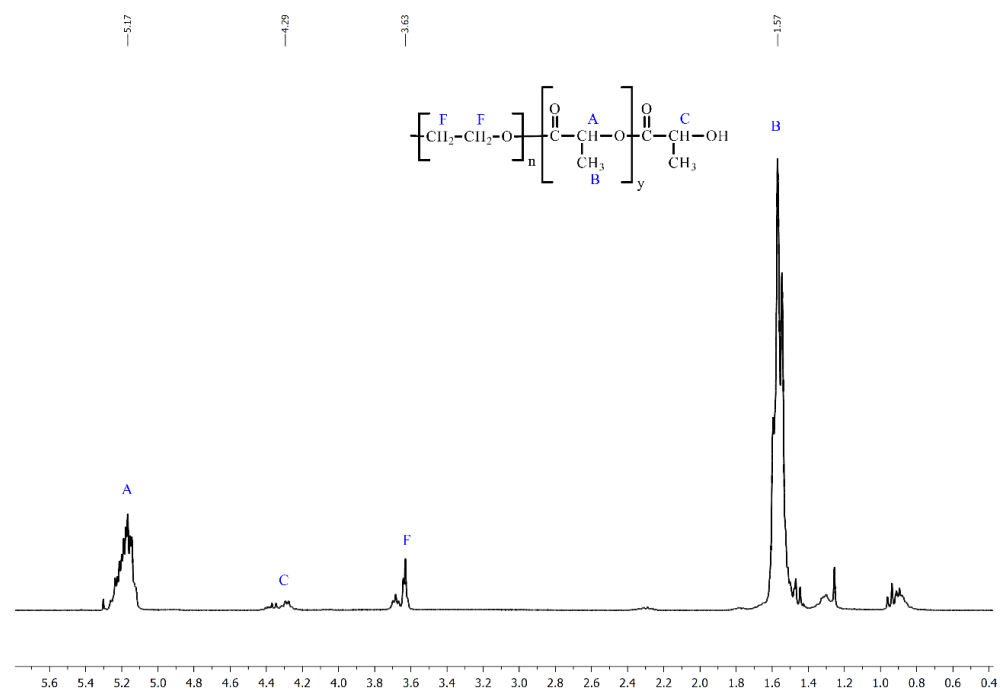

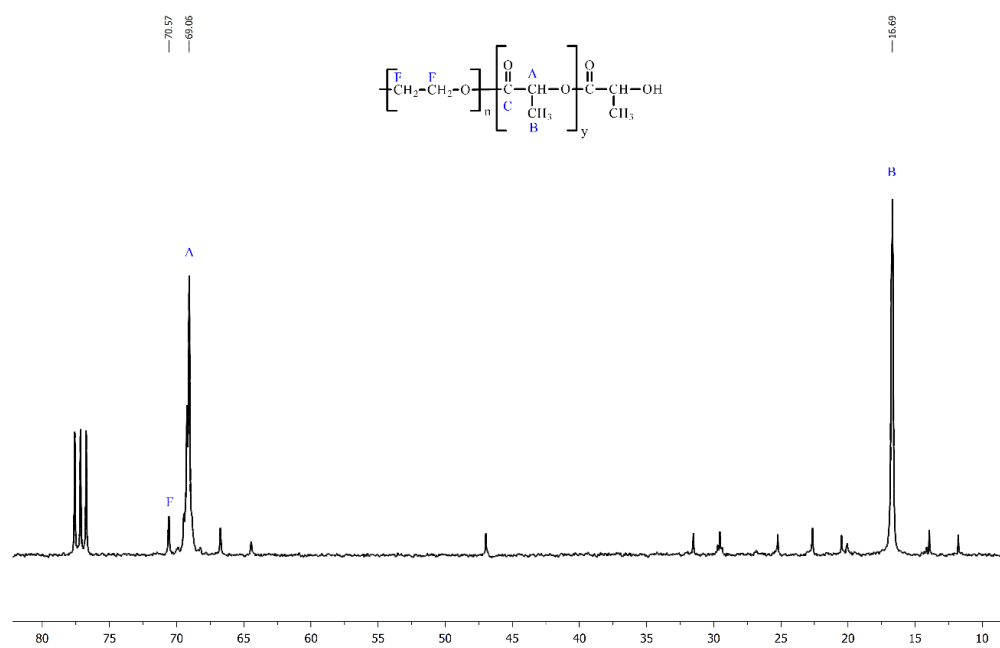

**Figure S4.** The  $^{13}\text{C}$  NMR spectrum of *rac*-LA-PEG (in  $\text{CDCl}_3$ ).
